# Supplementary material for: Analysis of the transcriptome of bovine endometrial cells isolated by laser micro-dissection (2): impacts of post-partum negative energy balance on stromal, glandular and luminal epithelial cells
Source: PubMed Central journal article supplement (PMC8212477; doi:10.1186/s12864-021-07713-z), 2021-06-18
Supplement: 12864_2021_7713_MOESM3_ESM.pdf [file 12864_2021_7713_MOESM3_ESM.pdf]

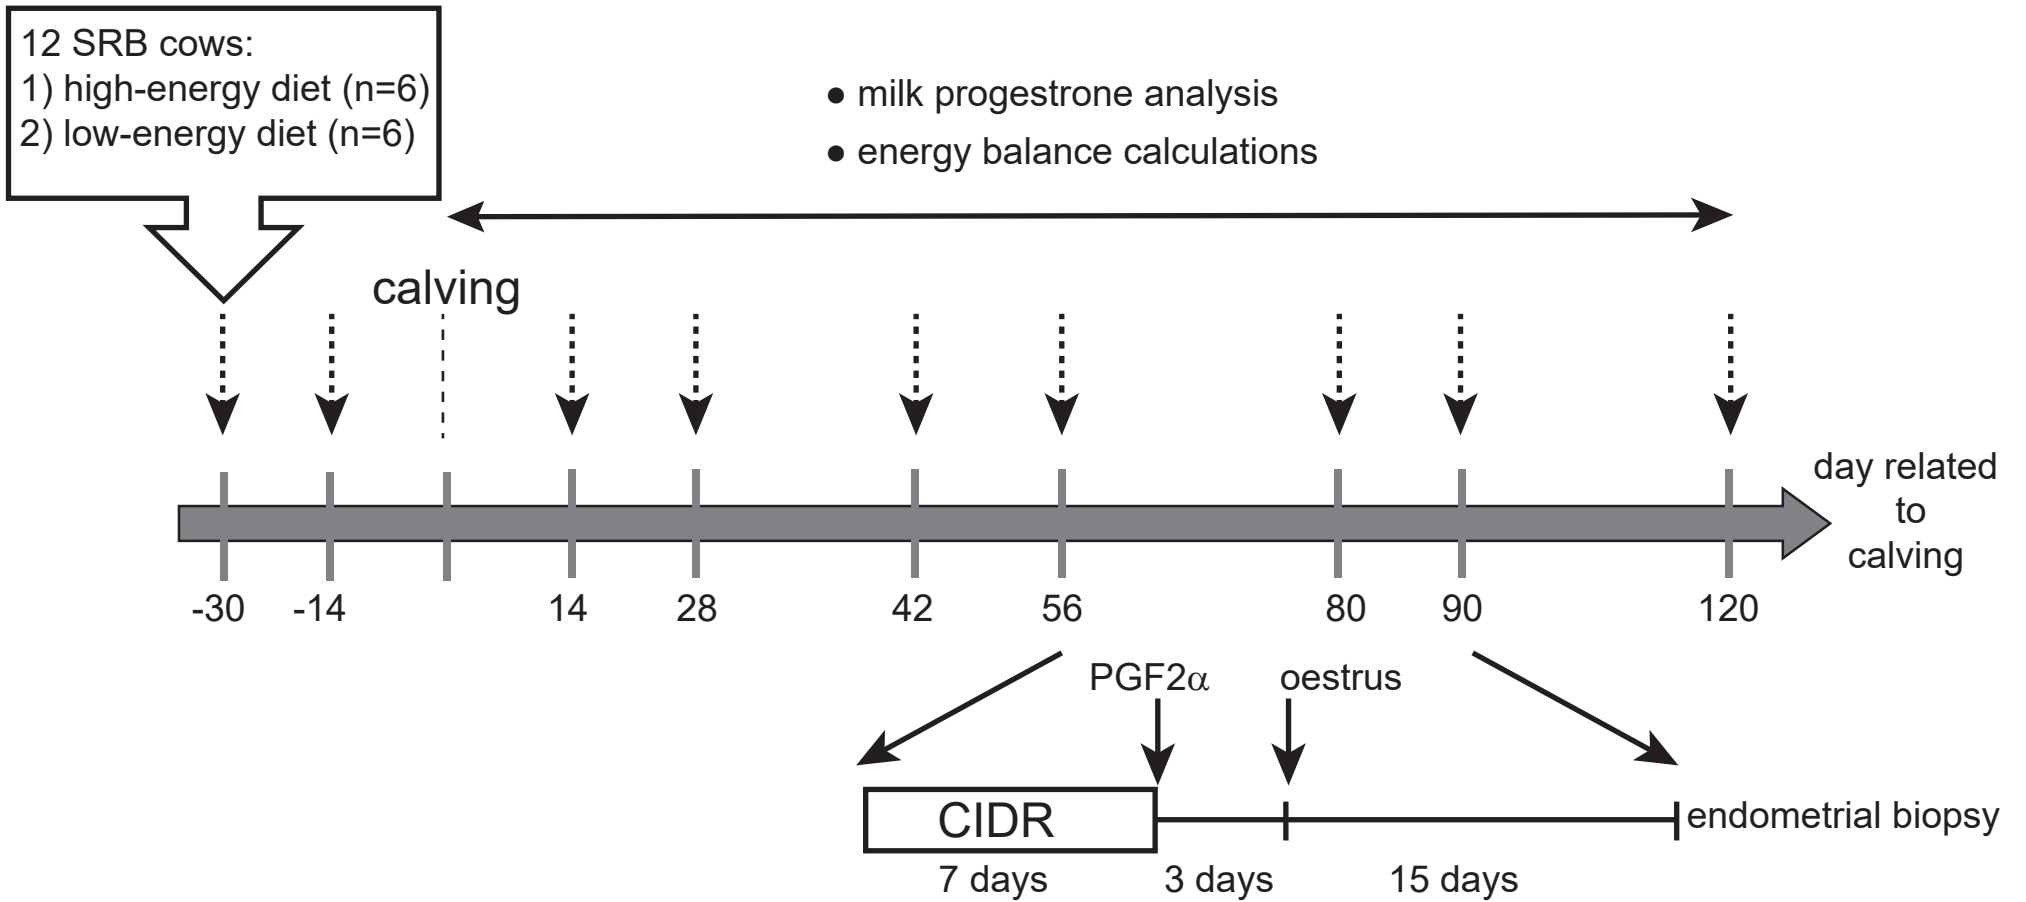

figure S1
